# Supplementary material for: Predicting Statistical Properties of Open Reading Frames in Bacterial Genomes
Source: PubMed Central journal article supplement (PMC3454372; doi:10.1371/journal.pone.0045103), 2012-09-24
Supplement: pone.0045103.s001.pdf [file pone.0045103.s001.pdf]

| Species                                                                    | Abbr. | GC [%] | Length [bp] | Accession |
|----------------------------------------------------------------------------|-------|--------|-------------|-----------|
| <i>Candidatus Phytoplasma mali</i>                                         | CPm   | 21.4   | 601943      | NC_011047 |
| <i>Wigglesworthia brevipalpis</i>                                          | Wb    | 22.5   | 697724      | NC_004344 |
| <i>Streptobacillus moniliformis</i> DSM 12112                              | Strm  | 26.3   | 1662578     | NC_013515 |
| <i>Arcobacter butzleri</i> RM4018                                          | Ab    | 27     | 2341251     | NC_009850 |
| <i>Clostridium botulinum</i> A str. ATCC 19397                             | Cb    | 28.2   | 3863450     | NC_009697 |
| <i>Clostridium difficile</i> 630                                           | Cdif  | 29.1   | 4290252     | NC_009089 |
| <i>Campylobacter jejuni</i> RM1221                                         | Cj    | 30.3   | 1777831     | NC_003912 |
| <i>Clostridium acetobutylicum</i> ATCC824                                  | Ca    | 30.9   | 3940880     | NC_003030 |
| <i>Clostridium ljungdahlii</i> DSM 13528                                   | Clj   | 31.1   | 4630065     | NC_014328 |
| <i>Francisella tularensis</i> subsp. <i>holarctica</i> FTNF002-00          | Fth   | 32.2   | 1890909     | NC_009749 |
| <i>Staphylococcus aureus</i> subsp. <i>aureus</i> JH1                      | Staa  | 33     | 2906507     | NC_009632 |
| <i>Flavobacterium johnsoniae</i> UW101                                     | Fj    | 34.1   | 6096872     | NC_009441 |
| <i>Bacillus cereus</i> ATCC 14579                                          | Bce   | 35.3   | 5411809     | NC_004722 |
| <i>Anaerococcus prevotii</i> DSM 20548                                     | Ap    | 36.1   | 1883067     | NC_013171 |
| <i>Legionella longbeachae</i> NSW150                                       | Llo   | 37.1   | 4077332     | NC_013861 |
| <i>Listeria monocytogenes</i> EGDe                                         | Lm    | 38     | 2944528     | NC_003210 |
| <i>Helicobacter pylori</i> HPAG1                                           | Hp    | 39.1   | 1596366     | NC_008086 |
| <i>Streptococcus pneumoniae</i> TCH8431/19A                                | Strp  | 39.8   | 2088772     | NC_014251 |
| <i>Acinetobacter</i> sp. ADP1                                              | Asp   | 40.4   | 3598621     | NC_005966 |
| <i>Streptococcus suis</i> 05ZYH33                                          | Strs  | 41.1   | 2096309     | NC_009442 |
| <i>Gardnerella vaginalis</i> 409-05                                        | Gv    | 42     | 1617545     | NC_013721 |
| <i>Bacteroides fragilis</i> NCTC 9343                                      | Bf    | 43.2   | 5205140     | NC_003228 |
| <i>Campylobacter curvus</i> 525.92                                         | Cc    | 44.5   | 1971264     | NC_009715 |
| <i>Xenorhabdus bovienii</i> SS-2004                                        | Xb    | 45     | 4225498     | NC_013892 |
| <i>Tropheryma whippelii</i> TW08/27                                        | Tw    | 46.3   | 925938      | NC_004551 |
| <i>Haliscomenobacter hydrossis</i> DSM 1100                                | Hh    | 47.1   | 8371686     | NC_015510 |
| <i>Yersinia enterocolitica</i> subsp. <i>enterocolitica</i> 8081           | Yee   | 47.3   | 4615899     | NC_008800 |
| <i>Porphyromonas gingivalis</i> W83                                        | Pg    | 48.3   | 2343476     | NC_002950 |
| <i>Geobacillus thermodenitrificans</i> NG80-2                              | Gth   | 49     | 3550319     | NC_009328 |
| <i>Spirosoma linguale</i> DSM 74                                           | Sl    | 50.2   | 8078757     | NC_013730 |
| <i>Nitrosococcus oceani</i> ATCC 19707                                     | No    | 50.3   | 3481691     | NC_007484 |
| <i>Paenibacillus</i> sp. JDR-2                                             | Ps2   | 50.3   | 7184930     | NC_012914 |
| <i>Escherichia coli</i> O157:H7 EDL933                                     | EcE   | 50.4   | 5528445     | NC_002655 |
| <i>Escherichia coli</i> O157:H7 Sakai                                      | EcS   | 50.5   | 5498450     | NC_002695 |
| <i>Pectobacterium wasabiae</i> WPP163                                      | Pw    | 50.5   | 5063892     | NC_013421 |
| <i>Shigella sonnei</i> Ss046                                               | Shs   | 51     | 4825265     | NC_007384 |
| <i>Salmonella enterica</i> subsp. <i>enterica</i> serovar Agona str. SL483 | See   | 52.1   | 4798660     | NC_011149 |
| <i>Corynebacterium diphtheriae</i> NCTC 13129                              | Cdiph | 53.5   | 2488635     | NC_002935 |
| <i>Magnetococcus</i> sp. MC-1                                              | Msp   | 54.2   | 4719581     | NC_008576 |
| <i>Mobiluncus curtisii</i> ATCC 43063                                      | Mc    | 55.4   | 2146480     | NC_014246 |
| <i>Renibacterium salmoninarum</i> ATCC 33209                               | Rsa   | 56.3   | 3155250     | NC_010168 |
| <i>Cronobacter turicensis</i> z3032                                        | Ct    | 57.4   | 4384526     | NC_013282 |
| <i>Paenibacillus mucilaginosus</i> KNP414                                  | Pm    | 58.4   | 8663821     | NC_015690 |
| <i>Bifidobacterium dentium</i> Bd1                                         | Bd    | 58.5   | 2636367     | NC_013714 |
| <i>Granulibacter bethesdensis</i> CGDNIH1                                  | Gbe   | 59.1   | 2708355     | NC_008343 |
| <i>Propionibacterium acnes</i> KPA171202                                   | Pac   | 60     | 2560265     | NC_006085 |
| <i>Pseudomonas fluorescens</i> PfO-1                                       | PfO-1 | 60.5   | 6438405     | NC_007492 |

Continued on next page

Table S1 – continued from previous page

| Species                                                  | Abbr. | GC [%] | Length [bp] | Accession |
|----------------------------------------------------------|-------|--------|-------------|-----------|
| <i>Pseudomonas fluorescens</i> SBW25                     | Pfl25 | 60.5   | 6722539     | NC_012660 |
| <i>Corynebacterium jeikeium</i> K411                     | CjK   | 61.4   | 2462499     | NC_007164 |
| <i>Laribacter hongkongensis</i> HLHK9                    | Lh    | 62.4   | 3169329     | NC_012559 |
| <i>Erythrobacter litoralis</i> HTCC2594                  | Eli   | 63.1   | 3052398     | NC_007722 |
| <i>Thermanaerovibrio acidaminovorans</i> DSM 6589        | Ta    | 63.8   | 1848474     | NC_013522 |
| <i>Mycobacterium abscessus</i> ATCC 19977T               | Ma    | 64.1   | 5067172     | NC_010397 |
| <i>Xanthomonas campestris</i> pathovar <i>campestris</i> | Xcc   | 65     | 5079002     | NC_007086 |
| <i>Burkholderia</i> sp. 383 3                            | Bsp   | 65.3   | 1395069     | NC_007509 |
| <i>Pseudomonas aeruginosa</i> LESB58                     | Pae   | 66.3   | 6601757     | NC_011770 |
| <i>Gordonia bronchialis</i> DSM 43247                    | Gbr   | 67.1   | 5208602     | NC_013441 |
| <i>Bordetella bronchiseptica</i> RB50                    | Bbr   | 68.1   | 5339179     | NC_002927 |
| <i>Thermus thermophilus</i> HB8                          | Tth   | 69.5   | 1849742     | NC_006461 |
| <i>Haliangium ochraceum</i> DSM 14365                    | Ho    | 69.5   | 9446314     | NC_013440 |
| <i>Nocardia farcinica</i> IFM10152                       | Nf    | 70.8   | 6021225     | NC_006361 |
| <i>Streptosporangium roseum</i> DSM 43021                | Sr    | 70.9   | 10341314    | NC_013595 |
| <i>Kocuria rhizophila</i> DC2201                         | Kr    | 71.2   | 2697540     | NC_010617 |
| <i>Amycolatopsis mediterranei</i> U32                    | Am    | 71.3   | 10236715    | NC_014318 |
| <i>Kytococcus sedentarius</i> DSM 20547                  | Ks    | 71.6   | 2785024     | NC_013169 |
| <i>Streptomyces coelicolor</i> A3(2)                     | Scoe  | 72.1   | 8667507     | NC_003888 |
| <i>Micrococcus luteus</i> NCTC 2665                      | Mlu   | 73     | 2501097     | NC_012803 |
| <i>Beutenbergia cavernae</i> DSM 12333                   | Bca   | 73.1   | 4669183     | NC_012669 |
| <i>Geodermatophilus obscurus</i> DSM 43160               | Go    | 74     | 5322497     | NC_013757 |
| <i>Anaeromyxobacter dehalogenans</i> 2CP-C               | Ad    | 74.9   | 5013479     | NC_007760 |
